# Supplementary material
Source: PubMed Central journal article supplement (PMC1847673)
Supplement: 7601647s2.pdf [file 7601647s2.pdf]

SUPPLEMENTARY INFORMATION

Fig. S2.

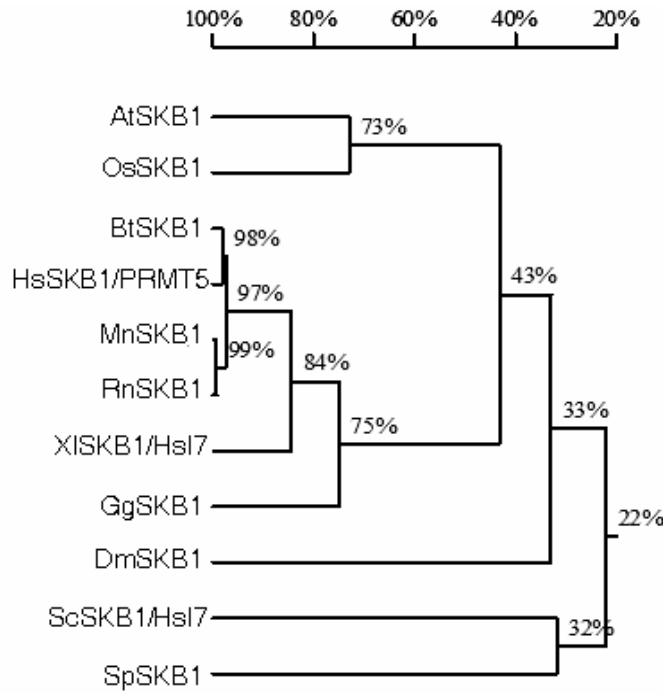

Fig. S2. Phylogenetic relationships among the SKB1 superfamily from a number of species. Abbreviations: At, *Arabidopsis thaliana* (NP\_194841); Bt, *Bos Taurus* (XP\_884160.1); Dm: *Drosophila melanogaster* (NP\_725552.1); Hs: *Homo sapiens* (NP\_006100.2); Gg, *Gallus gallus* (CAG31944.1); Mm: *Mus musculus* (NP\_038796.1); Os: *Oryza sativa* (XP\_464084.1); Rn, *Rattus norvegicus* (XP\_344406); Sc, *Saccharomyces cerevisiae* (CAA85090); Sp, *Schizosaccharomyces pombe* (AAV38169.1) and Xl, *Xenopus laevis* (AAH85216.1).
