# Supplementary material
Source: PubMed Central journal article supplement (PMC1847673)
Supplement: 7601647s3.pdf [file 7601647s3.pdf]

SUPPLEMENTARY INFORMATION

Fig. S3.

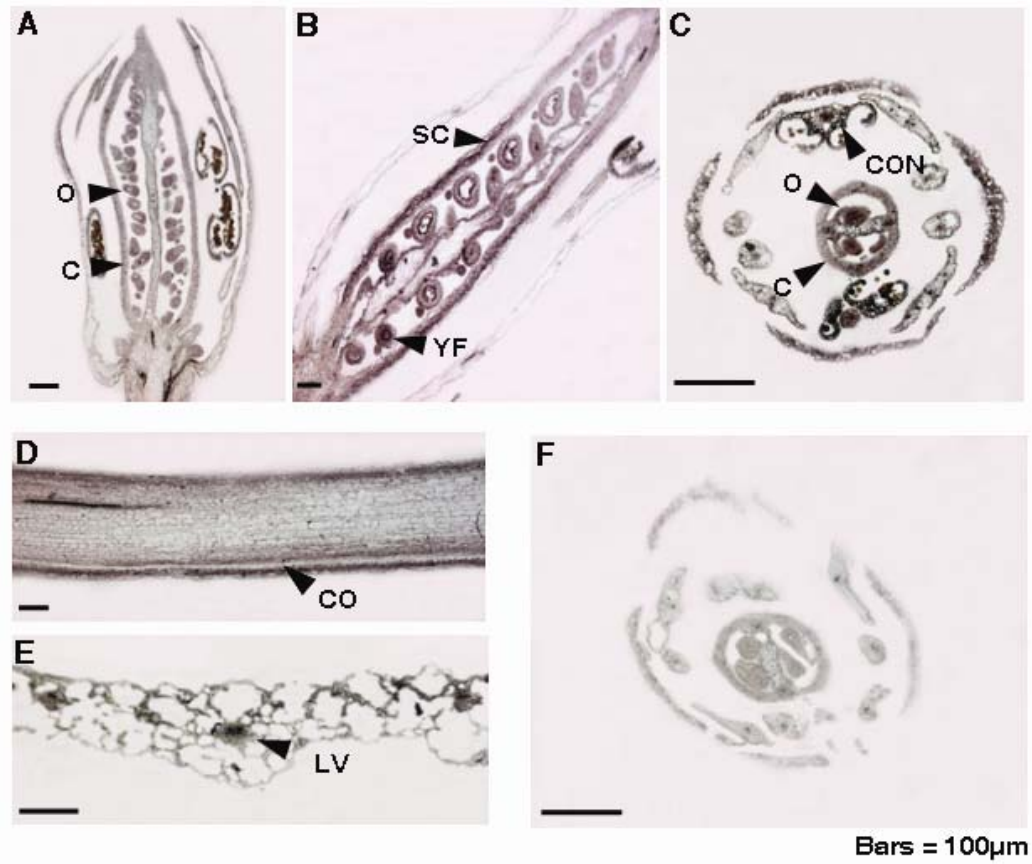

Fig. S3. *In situ* hybridization analysis of *SKB1* expression in tissues.

(A-E) probed with antisense. (F) probed with sense as a negative control. C: carpel; O: ovule; SC: seed capsule; YF: young fruit; CO: cortex; LV: leaf vein; CON: connectivum
