# Supplementary material
Source: PubMed Central journal article supplement (PMC1847673)
Supplement: 7601647s4.pdf [file 7601647s4.pdf]

SUPPLEMENTARY INFORMATION

Fig. S4.

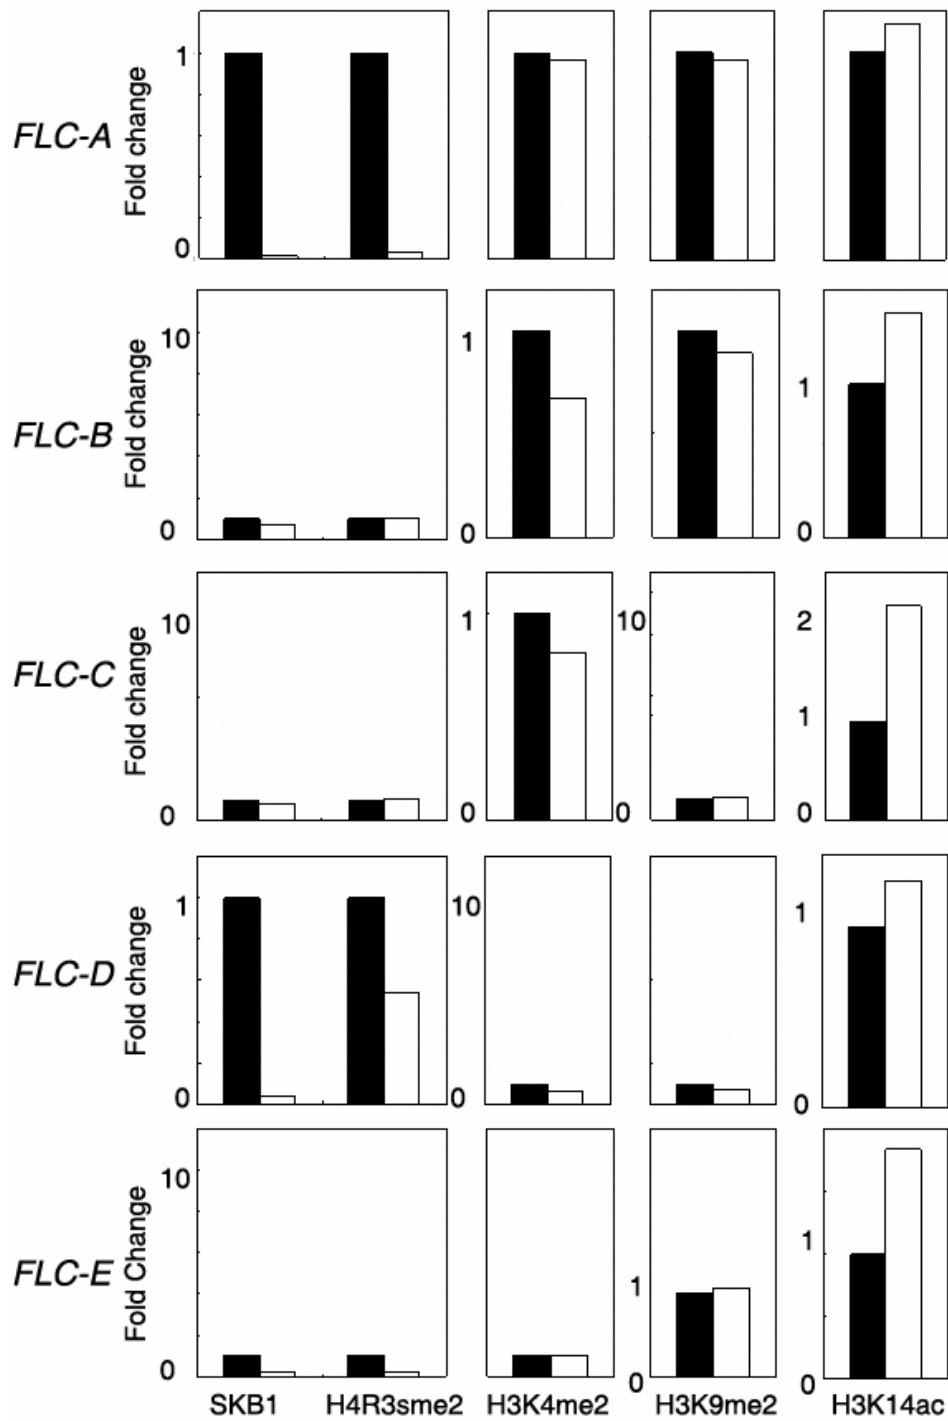

Fig. S4. Signal intensities in Fig. 5B-C were normalized relative to input reactions with ImageQuant, fold changes were shown in bar graphs. Black bars represented wild type col, and white bars were *skb1-1* mutant.
